# Supplementary material
Source: Research Square preprint supplement (doi:10.21203/rs.3.rs-8468729/v1)
Supplement: Supplementary file 1 [file 1efbc43064986799511bb0ce.docx]

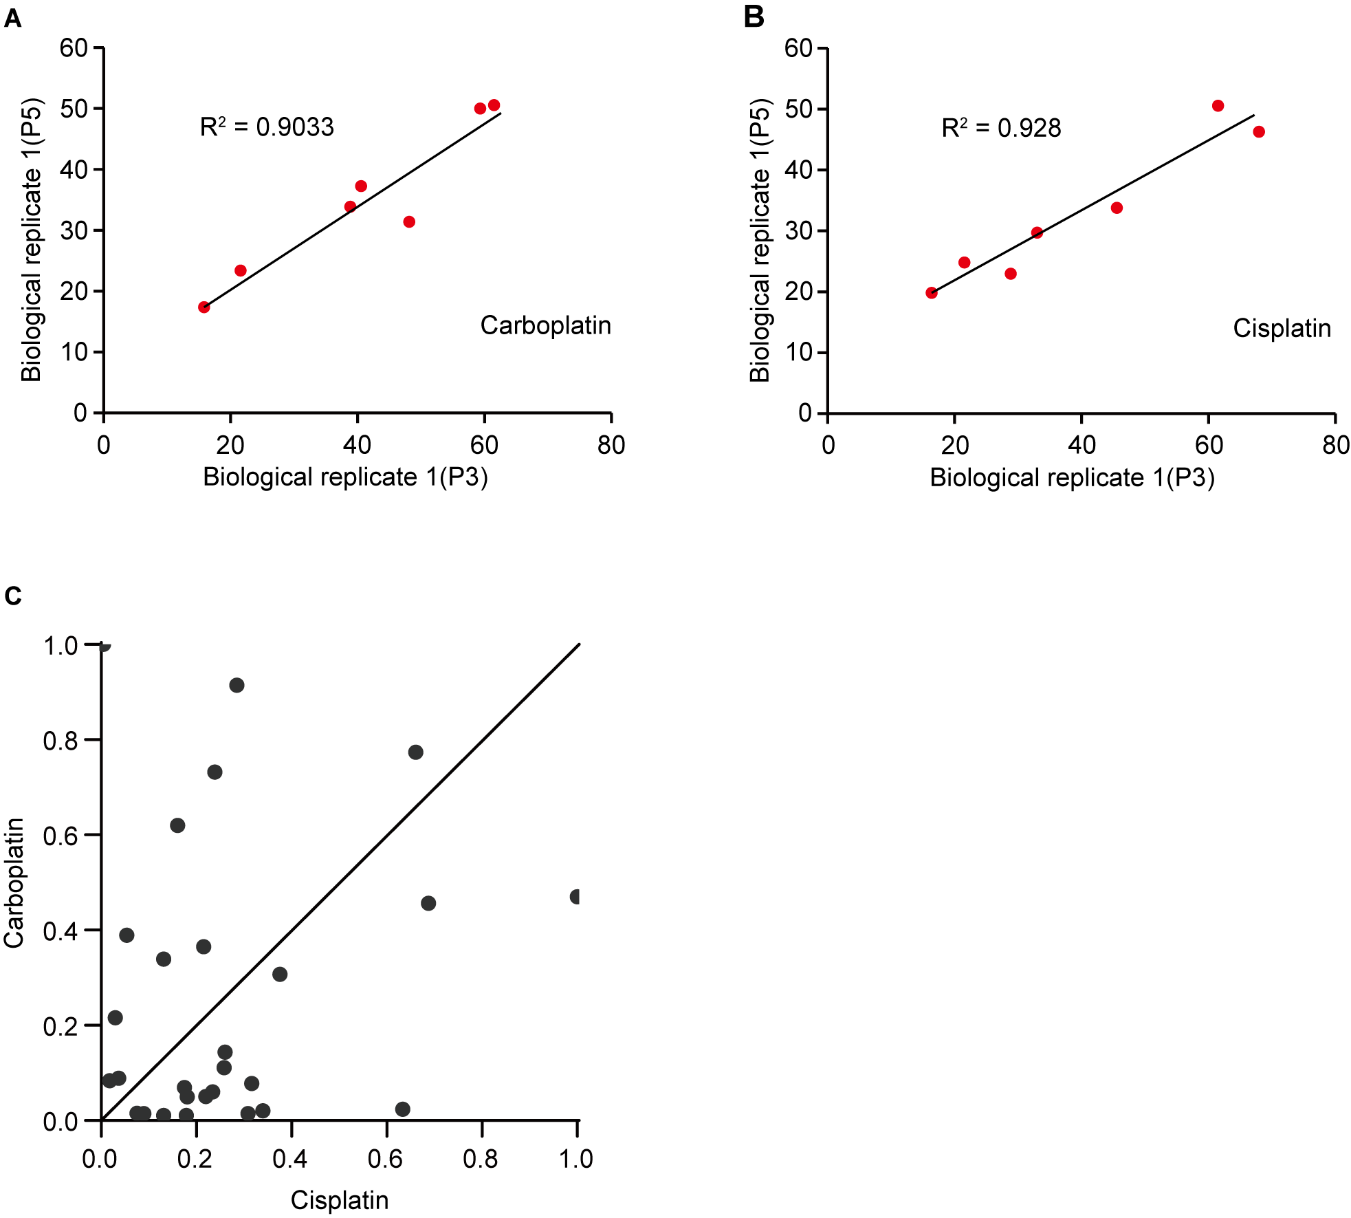


**Figur**e **S1.** (A) and (B) The AUC values for early-passage and late-passage organoids from the same organoid line demonstrated a high degree of consistency, with R² values of 0.9033 for carboplatin and 0.928 for cisplatin. (C) Organoids from the same patient exhibited varying sensitivities to carboplatin and cisplatin.


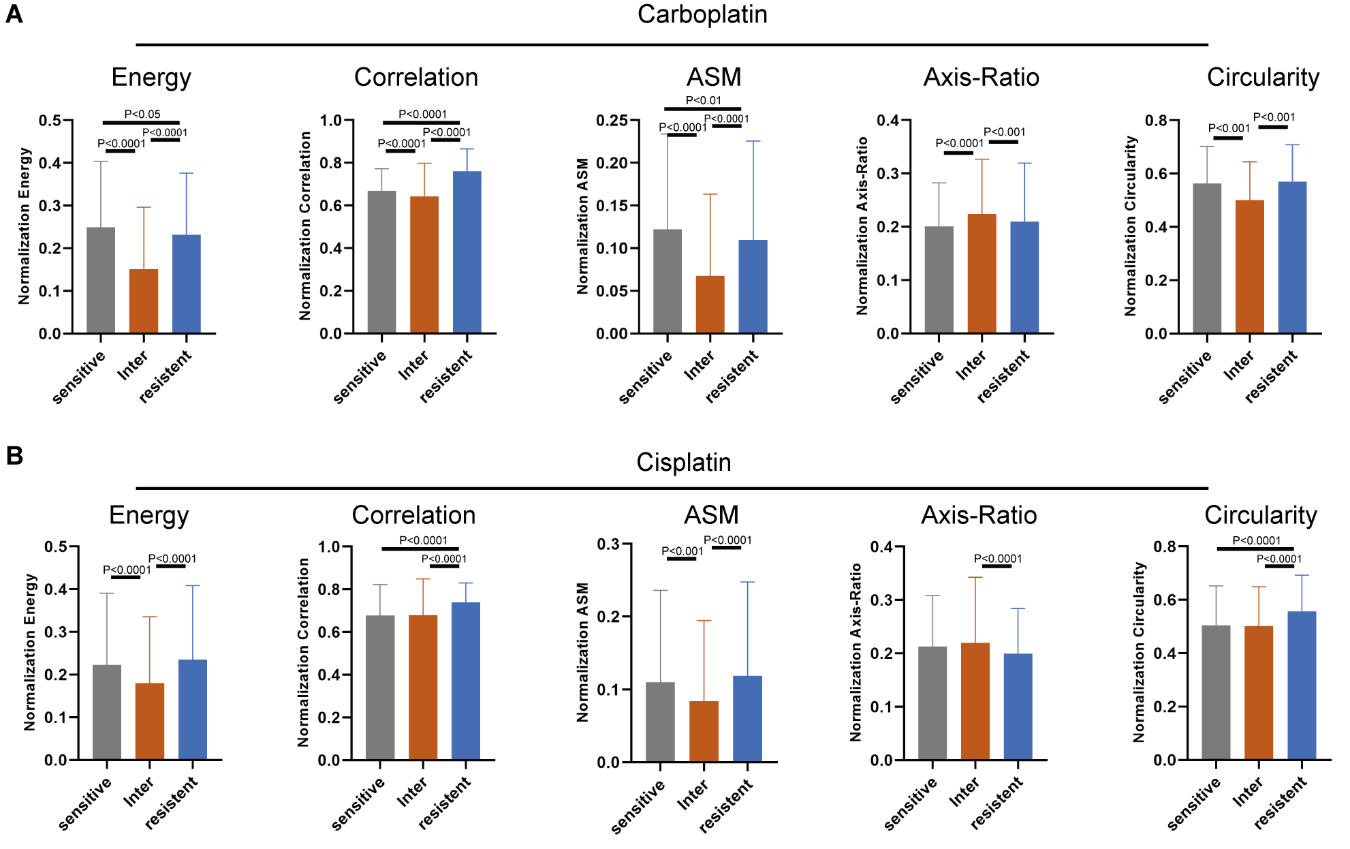


**Figur**e **S2.** (A) and (B) Correlations between cell roundness, aspect ratio and texture features of BC tissue and sensitivity to drugs: (A) carboplatin and (B) cisplatin.
